# Supplementary material
Source: Springer Nature journal article supplement (https://www.springermedizin.de/resource/supplementary/12885_2014_4574_MOESM5_ESM.pdf/9466724)

**HPV16**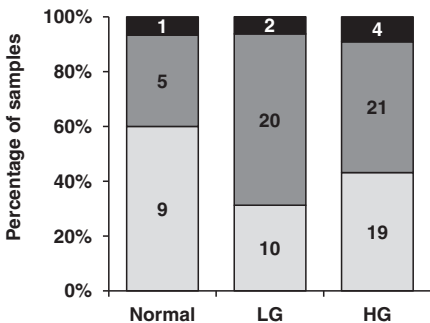**HPV18**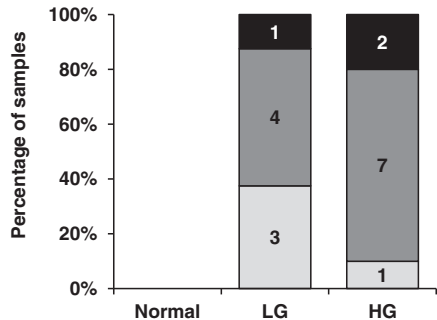**HPV31**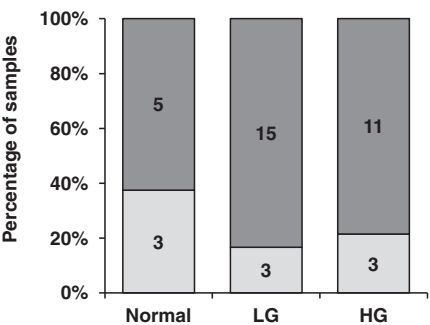**HPV45**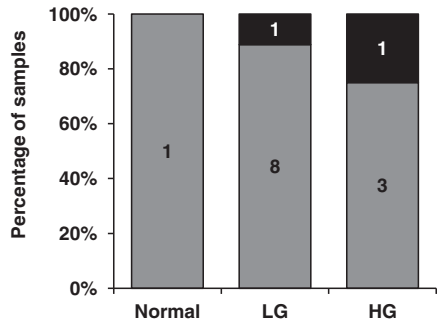**Overall**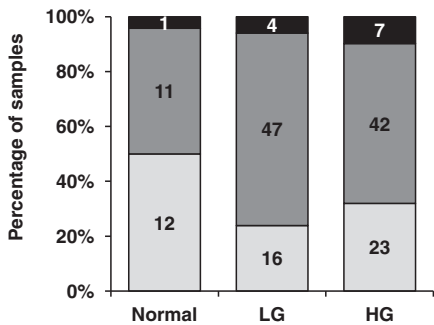

Supplement: MOESM5 [file 9466724]
